# Supplementary material for: A Case Report of Central Nervous System Graft-Versus-Host Disease and Literature Review
Source: Frontiers journal article supplement (doi:10.3389/fneur.2021.621392), 2021-03-10

Supplementary Chart 1

Proportion of Different Primary Diseases

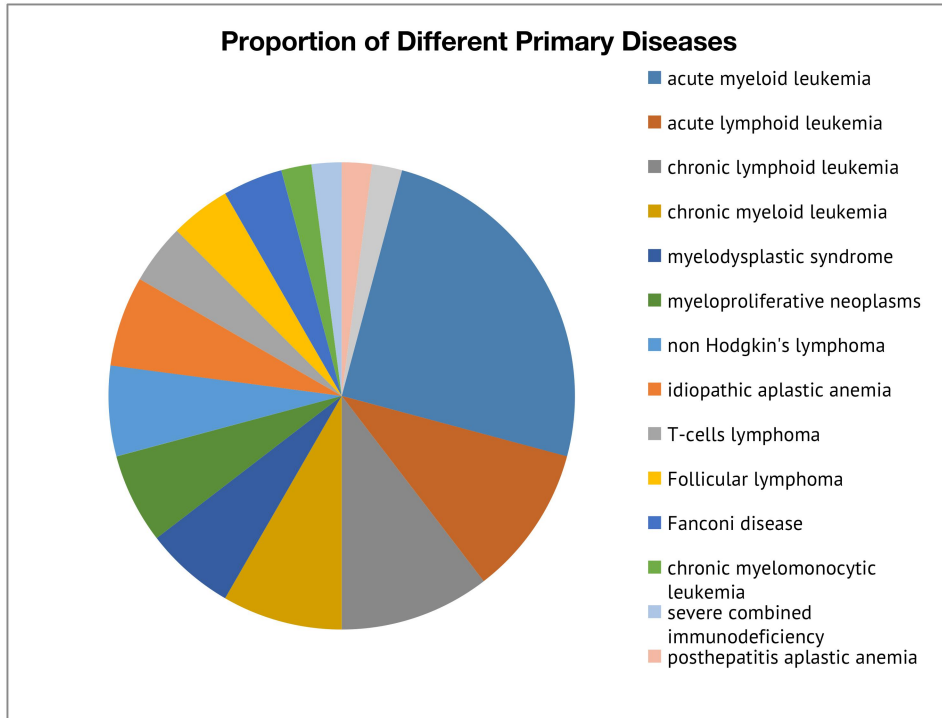

Supplement: Data_Sheet_1.pdf [file Data_Sheet_1.pdf]
